# Supplementary material
Source: HighWire-hosted journal article supplement (https://svn.bmj.com/content/svn-2023-002439)
Supplement: inline-supplementary-material-1 [file inline-supplementary-material-1.pdf]

## Supplemental materials

### **Protocol of determining secondary ICH.**

The causes of suspected secondary ICH include trauma, aneurysm or vascular malformation, systemic disease related coagulopathy, hemorrhagic venous infarct or hemorrhagic transformation of ischemic stroke. In this cohort, patients had finished all the examinations before they were included in this study. To be more specific, trauma was evaluated according to medical history and imaging examinations (including plain or enhanced CT, MRI of head, chest, abdomen, etc.). Aneurysm and vascular malformation were mainly according to CTA, MRI and DSA. Thrombus in cerebral venous sinus was diagnosed according to CE-MRV and clinical presentations. These diagnoses were determined by experienced neurologists and radiologists in a multiple disciplinary team.

**Supplemental Table 1** Comparison of characteristics in patients included and excluded

|                                                        | <b>Patients included<br/>(n=673)</b> | <b>Patients excluded<br/>(n=371)</b> | <b>P Value</b> |
|--------------------------------------------------------|--------------------------------------|--------------------------------------|----------------|
| <b>Demographics</b>                                    |                                      |                                      |                |
| Age, mean (SD), year                                   | 61 (13)                              | 62 (16)                              | 0.108          |
| Female sex, n (%)                                      | 237 (35.2%)                          | 109 (33.1%)                          | 0.515          |
| <b>Vascular risk factors and medical history, n(%)</b> |                                      |                                      |                |
| Hypertension                                           | 509 (75.6%)                          | 175 (74.2%)                          | 0.651          |
| Diabetes mellitus                                      | 112 (16.6%)                          | 34 (14.5%)                           | 0.435          |
| Atrial fibrillation                                    | 21 (3.1%)                            | 19 (8.1%)                            | 0.001          |
| Coronary heart disease                                 | 27 (4.0%)                            | 16 (6.9%)                            | 0.080          |
| Ischemic stroke or TIA                                 | 27 (4.0%)                            | 22 (9.4%)                            | 0.931          |
| Recurrent ICH                                          | 45 (6.7%)                            | 17 (7.3%)                            | 0.751          |
| Alcohol intake                                         | 209 (31.1%)                          | 88 (37.3%)                           | 0.079          |
| Smoking                                                | 228 (33.9%)                          | 89 (37.8%)                           | 0.288          |
| <b>Medication at baseline, n(%)</b>                    |                                      |                                      |                |
| Antiplatelet                                           | 58 (8.6%)                            | 29 (12.3%)                           | 0.099          |
| Anticoagulant therapy                                  | 7 (1.0%)                             | 16 (6.8%)                            | <0.001         |
| Statin                                                 | 36 (5.3%)                            | 21 (8.9%)                            | 0.051          |
| <b>GCS at baseline<sup>a</sup></b>                     | 15 (14-15)                           | 14 (11-15)                           | <0.001         |
| <b>Imaging characteristics</b>                         |                                      |                                      |                |
| OCT, hour <sup>a</sup>                                 | 5 (2-8)                              | 7 (3-24)                             | <0.001         |
| Hematoma volume, ml <sup>a</sup>                       | 9.0 (3.0-17.6)                       | 10.5 (4.2-26.4)                      | 0.007          |
| Lobar ICH, n (%)                                       | 143 (21.2%)                          | 56 (25.6%)                           | 0.033          |
| Intraventricular extension, n (%)                      | 192 (28.5%)                          | 86 (39.8%)                           | 0.002          |
| OMT, day <sup>a</sup>                                  | 5 (4-7)                              | 5 (3-7)                              | 0.102          |

Values are mean (SD), median (IQR) or number (%) as appropriate.

TIA, transient ischemic attack; ICH, intracerebral hemorrhage; GCS, Glasgow Coma Scale; OCT, time from onset to CT (hour); OMT, time from onset to MRI (day).

**Supplemental Table 2** Univariable regression analyses of factors associated with hematoma volume.

| <b>Variables</b>           | <b><math>\beta</math></b> | <b>95% CI</b>  | <b>P Value</b> |
|----------------------------|---------------------------|----------------|----------------|
| Age                        | 0.071                     | -0.009-0.152   | 0.081          |
| Female                     | 0.498                     | -2.661-1.664   | 0.652          |
| Hypertension               | -3.221                    | -5.615- -0.827 | 0.008          |
| Diabetes mellitus          | -3.829                    | -6.587- -1.071 | 0.007          |
| Atrial fibrillation        | -1.257                    | -7.197-4.684   | 0.678          |
| Coronary heart disease     | -3.661                    | -8.918-1.596   | 0.173          |
| Ischemic stroke or TIA     | 0.311                     | -3.261-3.883   | 0.864          |
| Recurrent ICH              | -1.274                    | -5.408-2.861   | 0.546          |
| Alcohol intake             | 0.242                     | -1.991-2.474   | 0.832          |
| Smoking                    | 0.710                     | -1.472-2.892   | 0.524          |
| Antiplatelet drugs         | -1.103                    | -4.783-2.577   | 0.557          |
| Anticoagulant drugs        | -1.695                    | -11.877-8.486  | 0.744          |
| Statin                     | -0.289                    | -6.678-2.499   | 0.372          |
| Lobar ICH                  | 14.716                    | 12.450-16.983  | <0.001         |
| Intraventricular extension | 3.772                     | 1.502-6.042    | 0.001          |
| cSS                        | 8.316                     | 5.784-10.848   | <0.001         |
| CMBs                       | 0.016                     | -0.059-0.092   | 0.670          |
| Lobar CMBs                 | 0.140                     | 0.023-0.256    | 0.019          |
| Non-lobar CMBs             | -0.157                    | -0.302- -0.011 | 0.035          |

mRS, modified Rankin Scale; TIA, transient ischemic attack; ICH, intracerebral hemorrhage; cSS, cortical superficial siderosis; CMB, cerebral microbleed.

**Supplemental Table 3** Multivariable regression analyses of factors associated with hematoma volume.

| <b>All patients</b>          | <b><math>\beta</math></b> | <b>95% CI</b>  | <b>P Value</b> |
|------------------------------|---------------------------|----------------|----------------|
| Age                          | -0.042                    | -0.116-0.031   | 0.256          |
| Hypertension                 | 0.251                     | -1.948-2.451   | 0.822          |
| Diabetes mellitus            | -3.371                    | -5.834- -0.909 | 0.007          |
| Lobar ICH                    | 13.842                    | 11.448-16.325  | <0.001         |
| Intraventricular extension   | 3.757                     | 1.682-5.831    | <0.001         |
| cSS                          | 4.523                     | 1.959-7.087    | <0.001         |
| CMB                          | /                         | /              | /              |
| Lobar CMBs                   | 0.002                     | -0.122-0.126   | 0.972          |
| Non-lobar CMBs               | -0.194                    | -0.342- -0.045 | 0.011          |
| <b>Sensitivity analysis*</b> | <b><math>\beta</math></b> | <b>95% CI</b>  | <b>P Value</b> |
| Age                          | -0.100                    | -0.180- -0.019 | 0.016          |
| Hypertension                 | 0.300                     | -2.054-2.654   | 0.803          |
| Diabetes mellitus            | -2.647                    | -5.303- -0.009 | 0.051          |
| Lobar ICH                    | 13.460                    | 10.836-16.084  | <0.001         |
| Intraventricular extension   | 3.886                     | 1.553-6.220    | 0.001          |
| cSS                          | 4.239                     | 1.390-7.088    | 0.004          |
| CMB                          | /                         | /              | /              |
| Lobar CMBs                   | -0.005                    | -0.135-0.125   | 0.939          |
| Non-lobarCMBs                | -0.177                    | -0.331- -0.023 | 0.024          |

Variables were selected from the univariable analyses with  $p < 0.1$  as a screening criterion.

\*Patients who had MRI within 1 week after ICH ictus.

ICH = intracerebral hemorrhage; cSS = cortical superficial siderosis; CMB = cerebral microbleed.

**Supplemental Table 4** Univariable regression analyses of factors associated with 90-day mRS.

| Variables                  | $\beta$ | 95% CI         | P Value |
|----------------------------|---------|----------------|---------|
| Age                        | 0.030   | 0.021-0.040    | <0.001  |
| Female                     | 0.298   | 0.035-0.561    | 0.027   |
| Hypertension               | -0.131  | -0.424-0.162   | 0.381   |
| Diabetes mellitus          | -0.186  | -0.522-0.149   | 0.277   |
| Atrial fibrillation        | -0.301  | -1.020-0.417   | 0.411   |
| Coronary heart disease     | -0.199  | -0.836-0.437   | 0.540   |
| Ischemic stroke or TIA     | 0.397   | -0.035-0.828   | 0.072   |
| Recurrent ICH              | 0.518   | 0.019-1.017    | 0.042   |
| Alcohol intake             | -0.058  | -0.330-0.214   | 0.676   |
| Smoking                    | -0.218  | -0.483-0.048   | 0.108   |
| Antiplatelet drugs         | 0.340   | -0.105-0.785   | 0.135   |
| Anticoagulant drugs        | 0.186   | -1.045-1.418   | 0.767   |
| Statin                     | 0.111   | -0.444-0.667   | 0.695   |
| Hematoma volume            | 0.041   | 0.032-0.050    | <0.001  |
| Lobar ICH                  | 0.161   | -0.147-0.470   | 0.305   |
| Intraventricular extension | 0.585   | 0.310-0.859    | <0.001  |
| cSS                        | 0.762   | 0.450-1.075    | <0.001  |
| CMB                        |         |                |         |
| Lobar CMBs                 | 0.027   | 0.013-0.041    | <0.001  |
| Non-lobar CMBs             | 0.009   | -0.009-0.028   | 0.314   |
| GCS at baseline            | -0.251  | -0.318- -0.184 | <0.001  |

663 patients with 90-day follow-up consented for analysis. mRS, modified Rankin Scale; TIA, transient ischemic attack; ICH, intracerebral hemorrhage; cSS, cortical superficial siderosis; CMB, cerebral microbleed; GCS, Glasgow Coma Scale.

**Supplemental Table 5** Multivariable regression analyses of factors associated with 90-day mRS.

| Variables                  | $\beta$ | 95% CI         | P Value |
|----------------------------|---------|----------------|---------|
| Age                        | 0.022   | 0.013-0.031    | <0.001  |
| Female                     | 0.218   | -0.029-0.465   | 0.084   |
| Ischemic stroke or TIA     | 0.110   | -0.298-0.517   | 0.598   |
| Previous ICH               | 0.297   | -0.178-0.772   | 0.221   |
| Intraventricular extension | 0.303   | 0.035-0.571    | 0.027   |
| Lobar CMBs                 | 0.012   | -0.002-0.026   | 0.084   |
| cSS                        | 0.333   | 0.008-0.659    | 0.045   |
| GCS at baseline            | -0.220  | -0.285- -0.155 | <0.001  |

Variables were selected from the univariable analyses with  $p < 0.1$  as a screening criterion. 663 patients with 90-day follow-up consented for analysis. mRS, modified Rankin Scale; TIA, transient ischemic attack; ICH, intracerebral hemorrhage; CMB, cerebral microbleed; cSS, cortical superficial siderosis; GCS, Glasgow Coma Score.

**Supplemental Table 6** Outcomes compared among four groups when single CMB was regarded as CMB-.

|                           | cSS-CMB-<br>(n = 255) | cSS-CMB+<br>(n = 287) | cSS+CMB-<br>(n = 38) | cSS+CMB+<br>(n = 93) |                |                   |                |
|---------------------------|-----------------------|-----------------------|----------------------|----------------------|----------------|-------------------|----------------|
| <b>Crude model</b>        |                       |                       |                      |                      |                |                   |                |
| <b>Primary outcome</b>    |                       | <b>OR (95%CI)</b>     | <b>P value</b>       | <b>OR (95%CI)</b>    | <b>P value</b> | <b>OR (95%CI)</b> | <b>P value</b> |
| 90-day mRS $\geq 3^*$     | Reference             | 1.6 (1.1, 2.3)        | 0.021                | 1.8 (0.8, 3.8)       | 0.127          | 3.4 (2.0, 5.6)    | <0.001         |
| <b>Secondary outcomes</b> |                       | <b>HR (95%CI)</b>     | <b>P value</b>       | <b>HR (95%CI)</b>    | <b>P value</b> | <b>HR (95%CI)</b> | <b>P value</b> |
| All-cause death           | Reference             | 2.3 (1.1, 5.0)        | 0.034                | 4.9 (1.6, 14.7)      | 0.004          | 7.3 (3.3, 15.8)   | <0.001         |
| Recurrent                 | Reference             | 4.4 (1.7, 11.7)       | 0.002                | 5.0 (1.2, 21.1)      | 0.027          | 9.7 (3.5, 26.6)   | <0.001         |

|                           |           |                   |                |                   |                |                   |                |
|---------------------------|-----------|-------------------|----------------|-------------------|----------------|-------------------|----------------|
| ICH                       |           |                   |                |                   |                |                   |                |
| Recurrent stroke          | Reference | 2.0 (1.1, 3.4)    | 0.018          | 1.9 (0.6, 5.7)    | 0.230          | 4.6 (2.5, 8.5)    | <0.001         |
| <b>Adjusted model†</b>    |           |                   |                |                   |                |                   |                |
| <b>Primary outcome</b>    |           | <b>OR (95%CI)</b> | <b>P value</b> | <b>OR (95%CI)</b> | <b>P value</b> | <b>OR (95%CI)</b> | <b>P value</b> |
| 90-day mRS $\geq$ 3*      | Reference | 1.5 (1.0, 2.2)    | 0.049          | 1.3 (0.6, 2.9)    | 0.456          | 2.7 (1.6, 4.6)    | <0.001         |
| <b>Secondary outcomes</b> |           | <b>HR (95%CI)</b> | <b>P value</b> | <b>HR (95%CI)</b> | <b>P value</b> | <b>HR (95%CI)</b> | <b>P value</b> |
| All-cause death           | Reference | 2.1 (1.0, 4.5)    | 0.060          | 2.5 (0.8, 7.8)    | 0.100          | 4.6 (2.1, 10.2)   | <0.001         |
| Recurrent ICH             | Reference | 4.5 (1.7, 11.8)   | 0.002          | 5.4 (1.2, 23.2)   | 0.024          | 10.2 (3.6, 28.7)  | <0.001         |
| Recurrent stroke          | Reference | 1.9 (1.1, 3.3)    | 0.027          | 1.6 (0.5, 4.8)    | 0.410          | 4.0 (2.1, 7.5)    | <0.001         |

\*663 patients with 90-day mRS evaluation were included in analyses for 90-day mRS.

†Adjusted by age, sex.

cSS, cortical superficial siderosis; CMB, cerebral microbleed; mRS, modified Rankin Scale; ICH, intracerebral hemorrhage.

**Supplemental Table 7.** Outcomes compared in CMB+ and cSS+ groups when single CMB was regarded as CMB-.

|                           | <b>cSS-CMB+</b><br>(n = 287) | <b>cSS+CMB+</b><br>(n = 93) |        | <b>cSS+CMB-</b><br>(n = 38) | <b>cSS+CMB+</b><br>(n = 93) |       |
|---------------------------|------------------------------|-----------------------------|--------|-----------------------------|-----------------------------|-------|
| <b>Crude model</b>        |                              |                             |        |                             |                             |       |
| <b>Primary outcome</b>    | <b>OR (95%CI) P value</b>    |                             |        | <b>OR (95%CI) P value</b>   |                             |       |
| 90-day mRS $\geq 3$       | Reference                    | 2.1 (1.3, 3.4)              | 0.002  | Reference                   | 1.9 (0.8, 4.2)              | 0.125 |
| <b>Secondary outcomes</b> | <b>HR (95%CI) P value</b>    |                             |        | <b>HR (95%CI) P value</b>   |                             |       |
| All-cause death           | Reference                    | 3.2 (1.8, 5.7)              | <0.001 | Reference                   | 1.5 (0.6, 3.9)              | 0.430 |
| Recurrent ICH             | Reference                    | 2.2 (1.1, 4.2)              | 0.018  | Reference                   | 1.9 (0.6, 6.7)              | 0.292 |
| Recurrent stroke          | Reference                    | 2.3 (1.4, 3.9)              | 0.001  | Reference                   | 2.4 (0.8, 6.9)              | 0.106 |
| <b>Adjusted model*</b>    |                              |                             |        |                             |                             |       |
| <b>Primary outcome</b>    | <b>OR (95%CI) P value</b>    |                             |        | <b>OR (95%CI) P value</b>   |                             |       |
| 90-day mRS $\geq 3$       | Reference                    | 1.8 (1.1, 2.9)              | 0.023  | Reference                   | 2.2 (0.9, 5.0)              | 0.075 |
| <b>Secondary outcomes</b> | <b>HR (95%CI) P value</b>    |                             |        | <b>HR (95%CI) P value</b>   |                             |       |
| All-cause death           | Reference                    | 2.3 (1.2, 4.1)              | 0.008  | Reference                   | 1.7 (0.6, 4.5)              | 0.295 |
| Recurrent ICH             | Reference                    | 2.4 (1.2, 4.6)              | 0.012  | Reference                   | 1.9 (0.5, 6.6)              | 0.313 |



|                  |           |                |       |           |                |       |
|------------------|-----------|----------------|-------|-----------|----------------|-------|
| Recurrent stroke | Reference | 2.2 (1.3, 3.8) | 0.003 | Reference | 2.5 (0.8, 7.2) | 0.095 |
|------------------|-----------|----------------|-------|-----------|----------------|-------|

\*Adjusted by age, sex.

cSS, cortical superficial siderosis; CMB, cerebral microbleed; mRS, modified Rankin Scale; ICH, intracerebral hemorrhage.

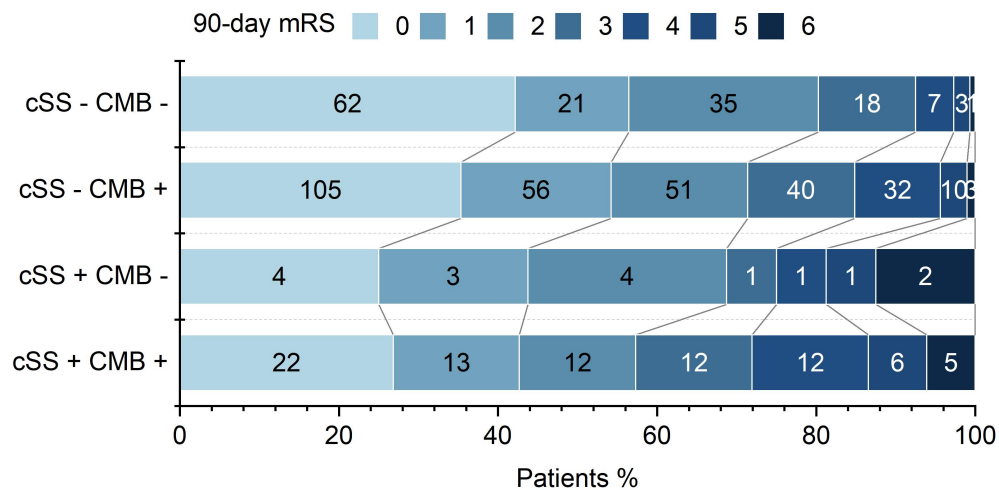

**Supplemental Figure 1** Sensitivity analysis of 90-day mRS distribution in four groups among patients who had MRI within 1 week after ICH ictus. 542 patients had 90-day mRS evaluation. cSS, cortical superficial siderosis; CMB, cerebral microbleed; mRS, modified Rankin Scale.

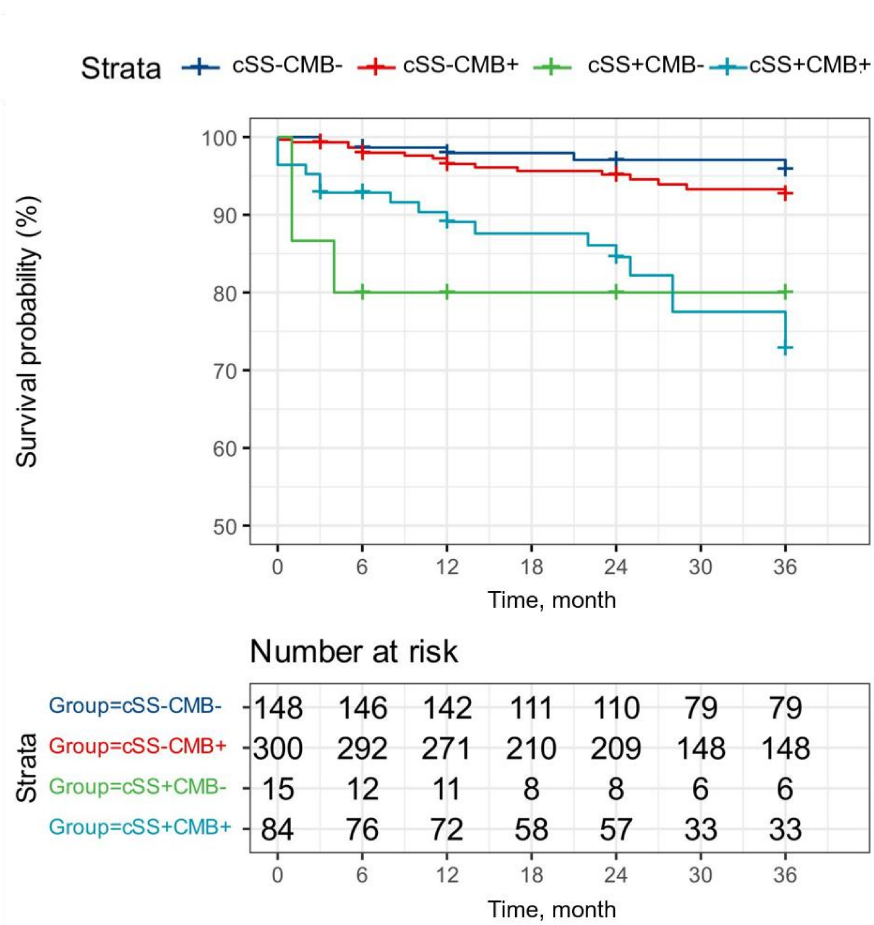

**Supplemental Figure 2** Sensitivity analysis of Kaplan-Meier survival curves among patients who had MRI within 1 week after ICH ictus during follow-up. cSS, cortical superficial siderosis; CMB, cerebral microbleed.

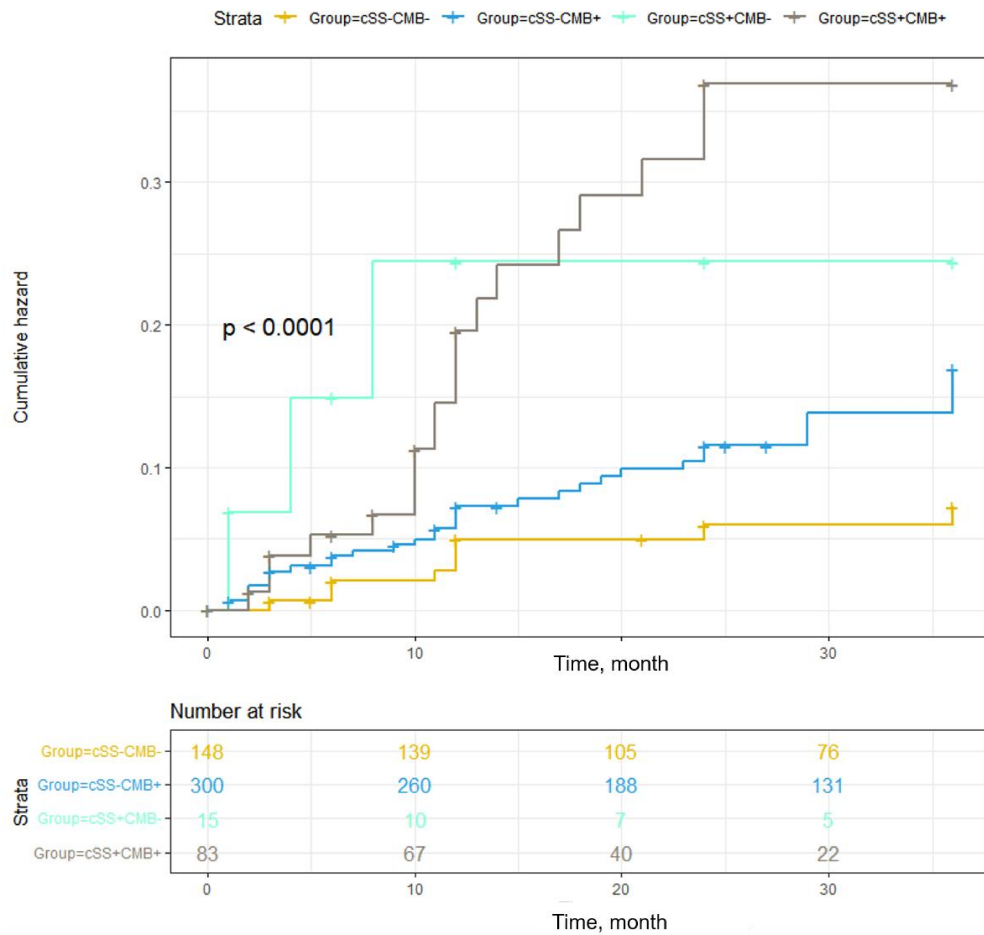

**Supplemental Figure 3** Sensitivity analysis of cumulative hazard of recurrent stroke of patients who had MRI within 1 week after ICH ictus during follow-up. cSS, cortical superficial siderosis; CMB, cerebral microbleed.

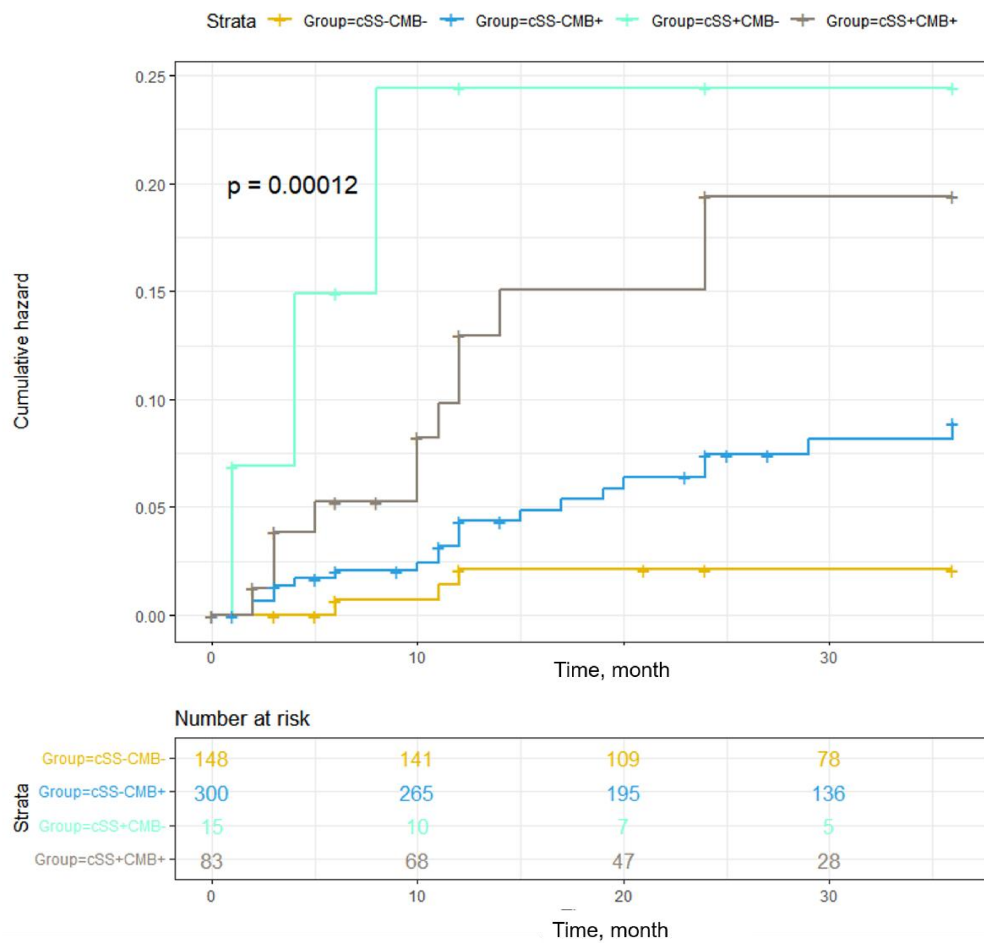

**Supplemental Figure 4** Sensitivity analysis of cumulative hazard of recurrent ICH of patients who had MRI within 1 week after ICH ictus during follow-up. cSS, cortical superficial siderosis; CMB, cerebral microbleed; ICH, intracerebral hemorrhage.

**Supplemental Table 8** Outcomes compared among four groups including NIHSS as covariable.

|                           | <b>cSS-CMB-</b><br>(n = 180) | <b>cSS-CMB+</b><br>(n = 362) | <b>cSS+CMB-</b><br>(n = 25) | <b>cSS+CMB+</b><br>(n = 106) |                |                   |                |  |
|---------------------------|------------------------------|------------------------------|-----------------------------|------------------------------|----------------|-------------------|----------------|--|
| <b>Adjusted model†</b>    |                              |                              |                             |                              |                |                   |                |  |
| <b>Primary outcome</b>    |                              | <b>OR (95%CI)</b>            | <b>P value</b>              | <b>OR (95%CI)</b>            | <b>P value</b> | <b>OR (95%CI)</b> | <b>P value</b> |  |
| 90-day mRS $\geq$ 3*      | Reference                    | 1.8 (1.1, 3.2)               | 0.030                       | 1.4 (0.4, 4.8)               | 0.562          | 3.6 (1.8,7.1)     | <0.001         |  |
| <b>Secondary outcomes</b> |                              | <b>HR (95%CI)</b>            | <b>P value</b>              | <b>HR (95%CI)</b>            | <b>P value</b> | <b>HR (95%CI)</b> | <b>P value</b> |  |
| All-cause death           | Reference                    | 1.9 (0.8, 4.4)               | 0.151                       | 2.3 (0.6, 9.0)               | 0.244          | 3.7 (1.5, 9.0)    | 0.003          |  |
| Recurrent ICH             | Reference                    | 5.4 (1.6, 18.2)              | 0.007                       | 7.4 (1.4, 40.9)              | 0.021          | 8.8 (2.4, 31.9)   | 0.001          |  |
| Recurrent stroke          | Reference                    | 2.2 (1.1, 4.3)               | 0.024                       | 2.1 (0.6, 7.9)               | 0.256          | 3.6 (1.7, 7.6)    | <0.001         |  |

\*663 patients with 90-day mRS evaluation were included in analyses for 90-day mRS.

† Adjusted by age, sex, history of hypertension, atrial fibrillation, coronary heart disease, previous ICH, ischemic stroke or TIA, smoking, alcohol intake, NIHSS.

cSS, cortical superficial siderosis; CMB, cerebral microbleed; mRS, modified Rankin Scale; ICH, intracerebral hemorrhage; NIHSS, National Institutes of Health Stroke Scale.

**Supplemental Table 9** Outcomes compared in CMB+ and cSS+ groups including NIHSS as covariable.

|                           | <b>cSS-CMB+</b><br>(n = 362) | <b>cSS+CMB+</b><br>(n = 106) |       | <b>cSS+CMB-</b><br>(n = 25) | <b>cSS+CMB+</b><br>(n = 106) |       |
|---------------------------|------------------------------|------------------------------|-------|-----------------------------|------------------------------|-------|
| <b>Adjusted model*</b>    |                              |                              |       |                             |                              |       |
| <b>Primary outcome</b>    | <b>OR (95%CI) P value</b>    |                              |       | <b>OR (95%CI) P value</b>   |                              |       |
| 90-day mRS $\geq$ 3       | Reference                    |                              |       | Reference                   |                              |       |
| <b>Secondary outcomes</b> | <b>HR (95%CI) P value</b>    |                              |       | <b>HR (95%CI) P value</b>   |                              |       |
| All-cause death           | Reference                    | 1.8 (1.0, 3.4)               | 0.047 | Reference                   | 2.4 (0.4, 12.3)              | 0.307 |
| Recurrent ICH             | Reference                    | 1.7 (0.8, 3.3)               | 0.142 | Reference                   | 1.8 (0.3, 9.7)               | 0.486 |
| Recurrent stroke          | Reference                    | 1.8 (1.0, 3.0)               | 0.031 | Reference                   | 2.2 (0.6, 8.3)               | 0.244 |

\*Adjusted by age, sex, history of hypertension, atrial fibrillation, coronary heart disease, previous ICH, ischemic stroke or TIA, smoking, alcohol intake, NIHSS.

cSS, cortical superficial siderosis; CMB, cerebral microbleed; mRS, modified Rankin Scale; ICH, intracerebral hemorrhage; NIHSS, National Institutes of Health Stroke Scale.

**Supplemental Table 10.** Outcomes compared among four groups adjusting age and sex

|                           | <b>cSS-CMB-</b><br><b>(n = 180)</b> | <b>cSS-CMB+</b><br><b>(n = 362)</b> | <b>cSS+CMB-</b><br><b>(n = 25)</b> | <b>cSS+CMB+</b><br><b>(n = 106)</b> |                |                   |                |
|---------------------------|-------------------------------------|-------------------------------------|------------------------------------|-------------------------------------|----------------|-------------------|----------------|
| <b>Adjusted model</b>     |                                     |                                     |                                    |                                     |                |                   |                |
| <b>Primary outcome</b>    |                                     | <b>OR (95%CI)</b>                   | <b>P value</b>                     | <b>OR (95%CI)</b>                   | <b>P value</b> | <b>OR (95%CI)</b> | <b>P value</b> |
| 90-day mRS $\geq$ 3*      | Reference                           | 1.5 (1.0, 2.4)                      | 0.058                              | 1.2 (0.4, 3.0)                      | 0.773          | 2.9 (1.6,4.9)     | <0.001         |
| <b>Secondary outcomes</b> |                                     | <b>HR (95%CI)</b>                   | <b>P value</b>                     | <b>HR (95%CI)</b>                   | <b>P value</b> | <b>HR (95%CI)</b> | <b>P value</b> |
| All-cause death           | Reference                           | 1.6 (0.7, 3.7)                      | 0.261                              | 2.2 (0.6, 8.7)                      | 0.256          | 3.9 (1.6, 9.2)    | 0.002          |
| Recurrent ICH             | Reference                           | 4.7 (1.4, 15.6)                     | 0.011                              | 10.4 (2.0, 53.4)                    | 0.005          | 10.9 (3.1, 38.7)  | <0.001         |
| Recurrent stroke          | Reference                           | 2.1 (1.1, 4.0)                      | 0.029                              | 2.3 (0.6, 8.3)                      | 0.217          | 4.2 (2.0, 8.8)    | <0.001         |

cSS, cortical superficial siderosis; CMB, cerebral microbleed; mRS, modified Rankin Scale; ICH, intracerebral hemorrhage.

**Supplemental Table 11.** Outcomes compared in CMB+ and cSS+ groups adjusting age and sex.

|                           | <b>cSS-CMB+</b><br><b>(n = 362)</b> | <b>cSS+CMB+</b><br><b>(n = 106)</b> |       | <b>cSS+CMB-</b><br><b>(n = 25)</b> | <b>cSS+CMB+</b><br><b>(n = 106)</b> |       |
|---------------------------|-------------------------------------|-------------------------------------|-------|------------------------------------|-------------------------------------|-------|
| <b>Adjusted model</b>     |                                     |                                     |       |                                    |                                     |       |
| <b>Primary outcome</b>    | <b>OR (95%CI) P value</b>           |                                     |       | <b>OR (95%CI) P value</b>          |                                     |       |
| 90-day mRS $\geq$ 3       | Reference                           | 1.8 (1.2, 2.9)                      | 0.010 | Reference                          | 2.6 (0.9, 7.0)                      | 0.063 |
| <b>Secondary outcomes</b> | <b>HR (95%CI) P value</b>           |                                     |       | <b>HR (95%CI) P value</b>          |                                     |       |
| All-cause death           | Reference                           | 2.4 (1.4, 4.3)                      | 0.003 | Reference                          | 1.7 (0.5, 5.6)                      | 0.400 |
| Recurrent ICH             | Reference                           | 2.4 (1.2, 4.6)                      | 0.010 | Reference                          | 1.0 (0.3, 3.4)                      | 0.948 |
| Recurrent stroke          | Reference                           | 2.1 (1.3,3.5)                       | 0.004 | Reference                          | 1.7 (0.5, 5.8)                      | 0.370 |

cSS, cortical superficial siderosis; CMB, cerebral microbleed; mRS, modified Rankin Scale; ICH, intracerebral hemorrhage.
